# Supplementary material for: A 3D titanate aerogel with cellulose as the adsorption-aggregator for highly efficient water purification
Source: Royal Society of Chemistry journal article supplement (doi:10.1039/c6ta10638b), 2017-01-01
Supplement: c6ta10638b1.pdf [file c6ta10638b1.pdf]

Electronic Supplementary Material (ESI) for Journal of Materials Chemistry A.

### 3D Titanate Aerogel with Cellulose as Adsorption-aggregator for High Efficient Water Quality Purification

Ye Xiong,<sup>a</sup> Chao Wang,<sup>a</sup> Hanwei Wang,<sup>a</sup> Qiufang Yao,<sup>a</sup> Bitao Fan,<sup>a</sup> Yipeng Chen,<sup>a</sup>

Qingfeng Sun,<sup>\*a,b</sup> Chunde Jin,<sup>\*a,b</sup> and Xijin Xu<sup>\*c</sup>

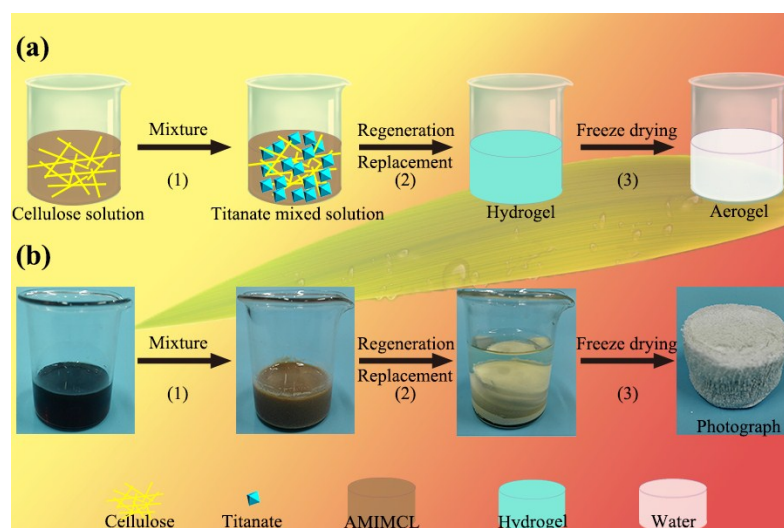

**Figure S1.** The schematic for the synthetic steps. **(1)** Titanate powder is dispersed into cellulose solution to generate a uniform suspension via vigorous stirring. **(2)** The composite hydrogel are gotten after dipping the freezing mixture in solidification liquid. **(3)** 3-D network titanate aerogel is obtained after further freeze-drying.

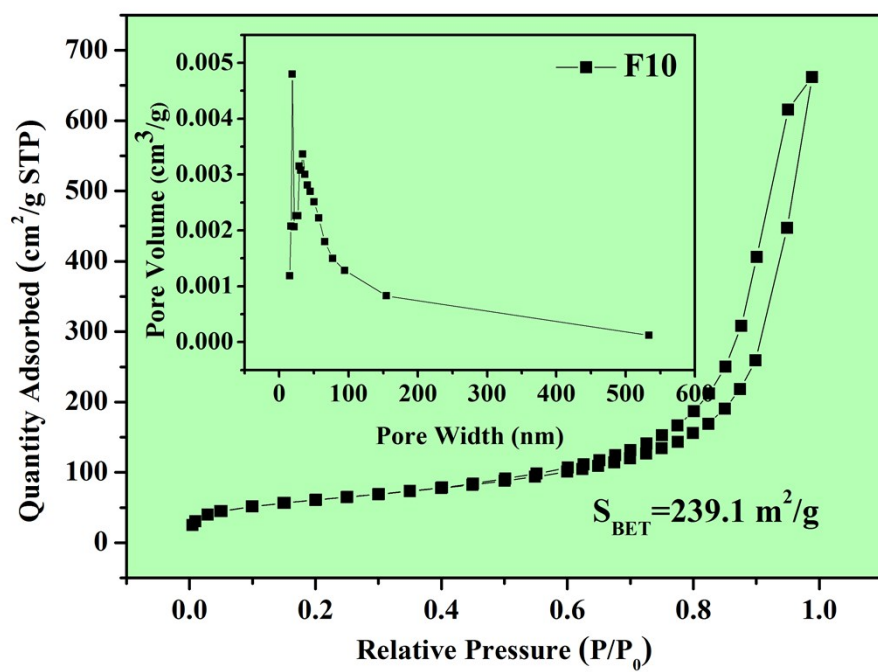

**Figure S2.** N<sub>2</sub> adsorption-desorption isotherm and the pore size distribution curve (inset) for the titanate aerogels.

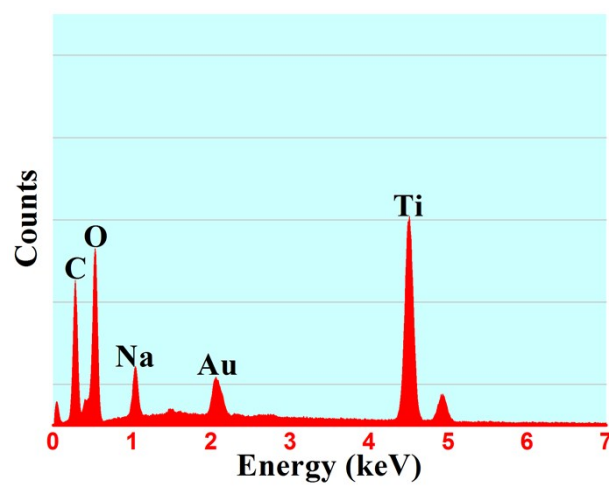

**Figure S3.** Energy spectrum of titanate aerogel.

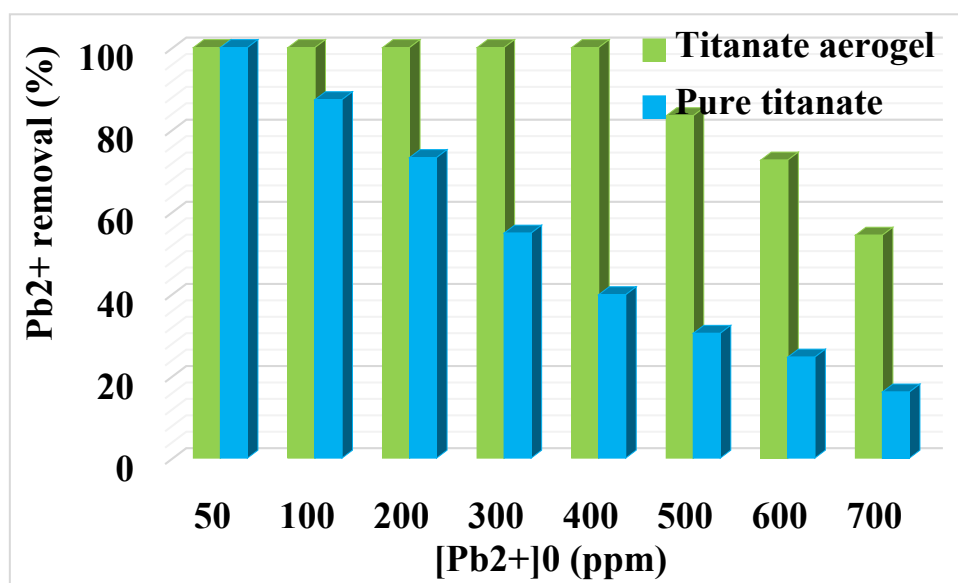

**Figure S4.** Removal of toxic Pb<sup>2+</sup> ions by titanate aerogel and pure titanate.

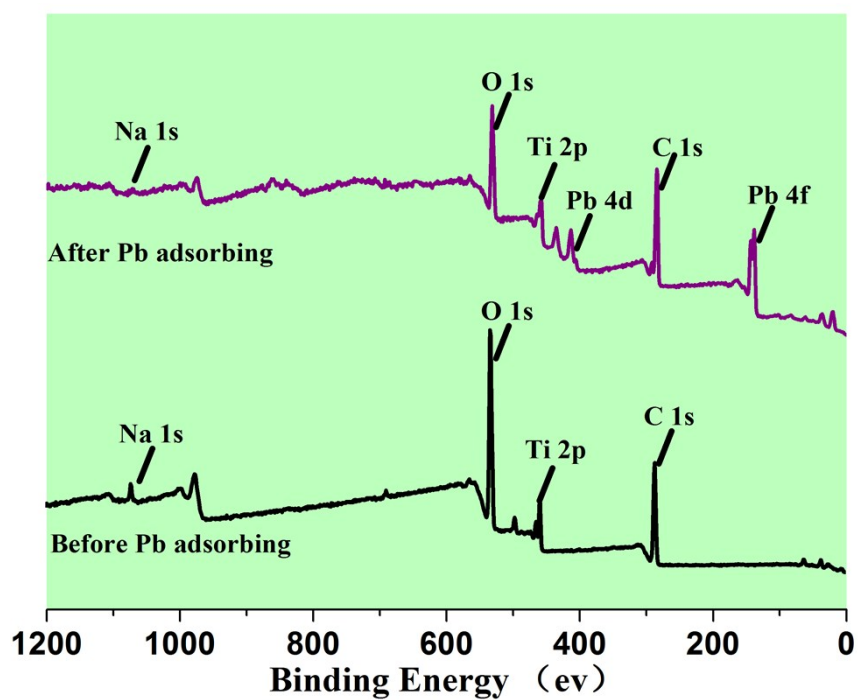

**Figure S5.** XPS spectrum of the titanate aerogel treated with  $\text{Pb}^{2+}$  solution for 48 h.
